# Supplementary material for: In vitro coronal protein signatures and biological impact of silver nanoparticles synthesized with different natural polymers as capping agents
Source: PubMed Central journal article supplement (PMC9418127; doi:10.1039/d0na01013h), 2021-05-17
Supplement: NA-003-D0NA01013H-s001.pdf [file NA-003-D0NA01013H-s001.pdf]

**Synthesis and *in vitro* and *in vivo* comparative investigation of alginate, gelatin and silk-fibroin capped silver nanoparticles**

*Priyanka Srivastava*<sup>1,4\*</sup>, *Cindy Gunawan*<sup>5</sup>, *Alexander Soeriyadi*<sup>2,6</sup>, *Rose Amal*<sup>3</sup>, *Kyle Hoehn*<sup>1</sup>,  
*Christopher Marquis*<sup>1\*</sup>

## Supplementary data

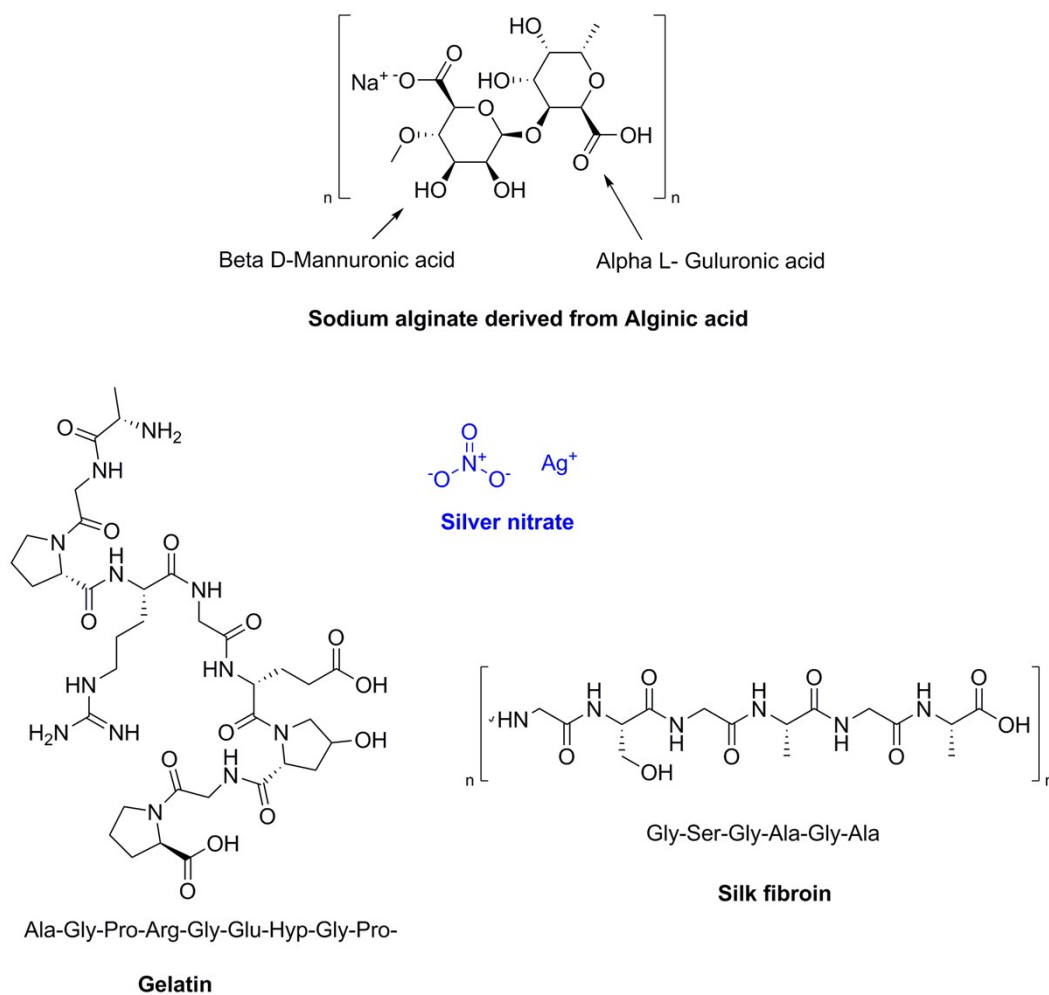

**Figure S1:** XPS survey spectra of individual atom constituents of a) Sodium alginate b) Gelatin c) Silk fibroin- stabilized nanosilver composites.

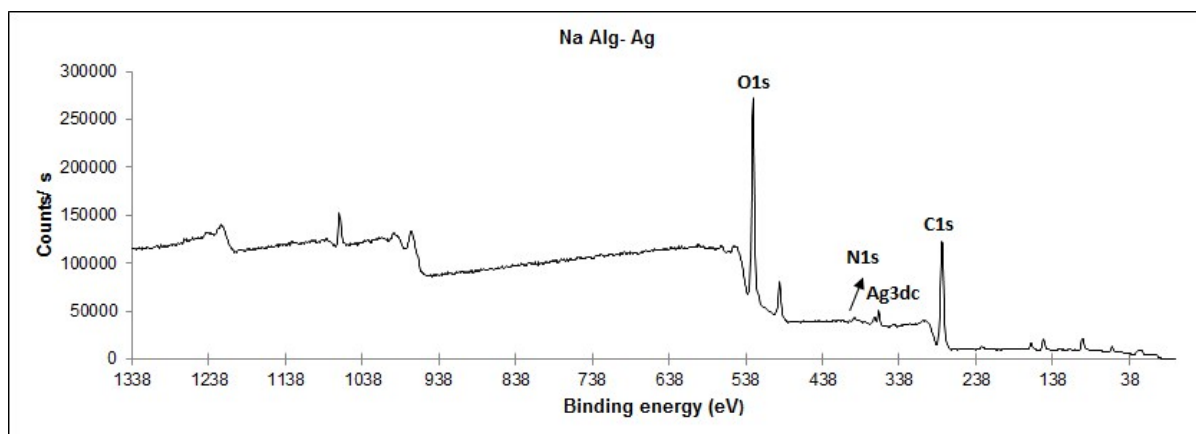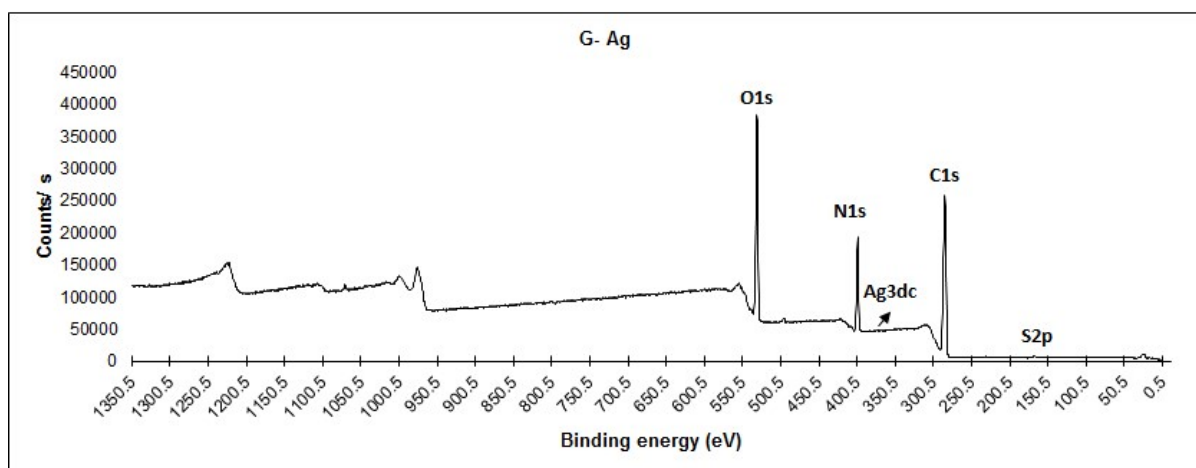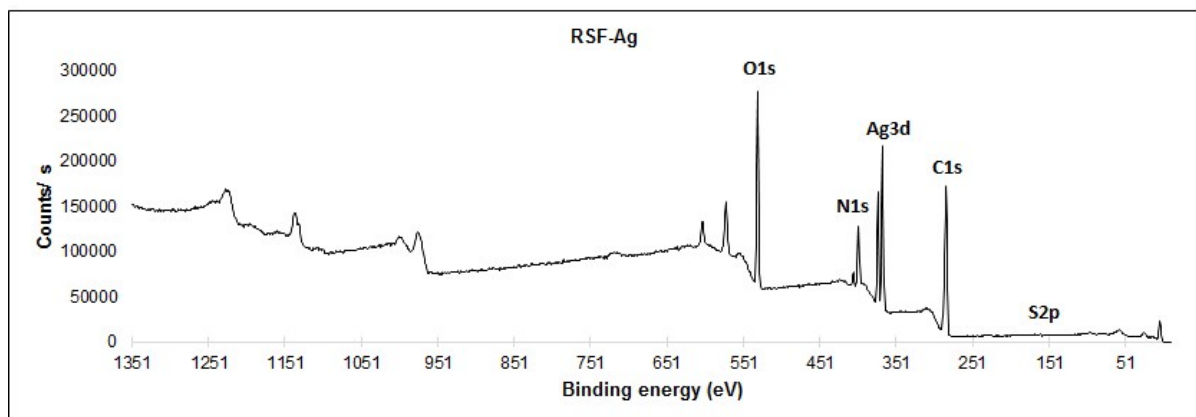

**Figure S2:** XPS survey scans of polymer-silver composites

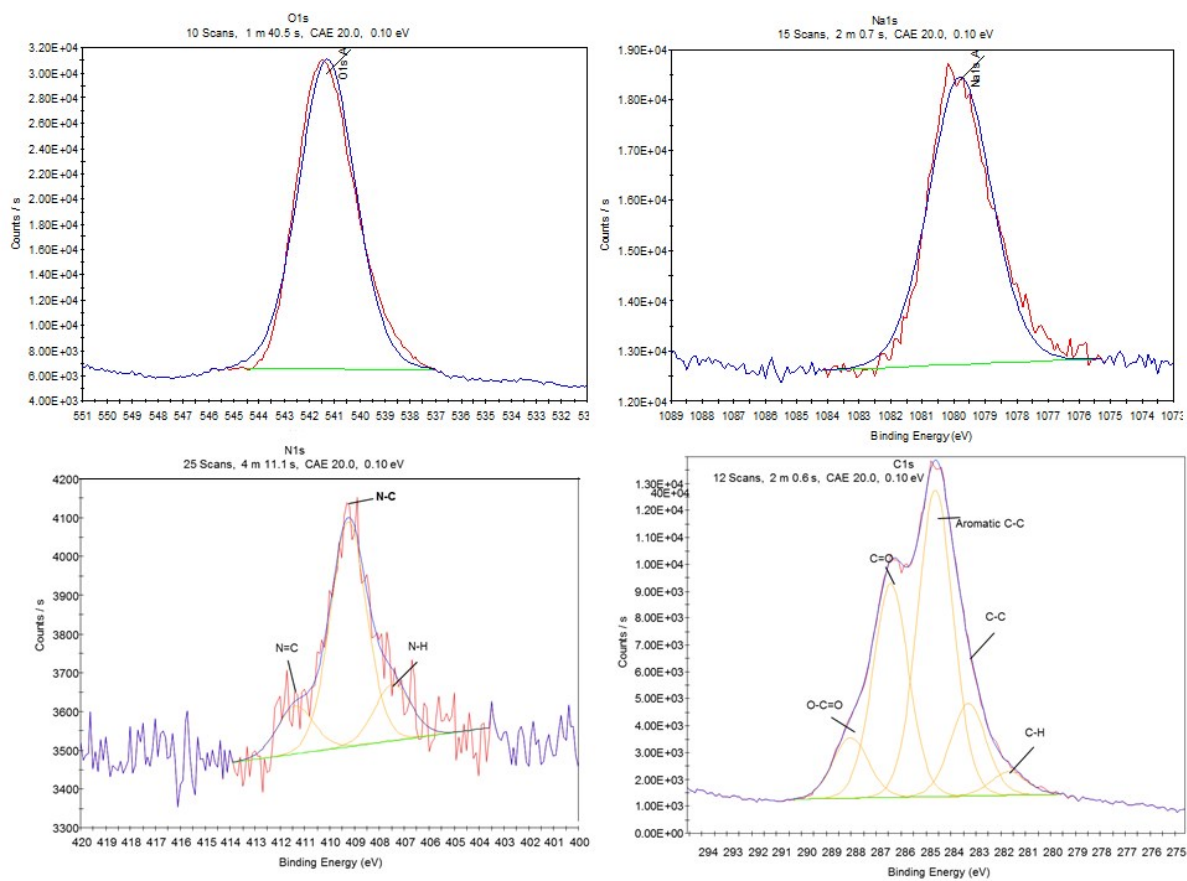

**Figure S3:** High resolution XPS spectra

**(a) Sodium alginate- silver nanocomposites (Na Alg-Ag)**

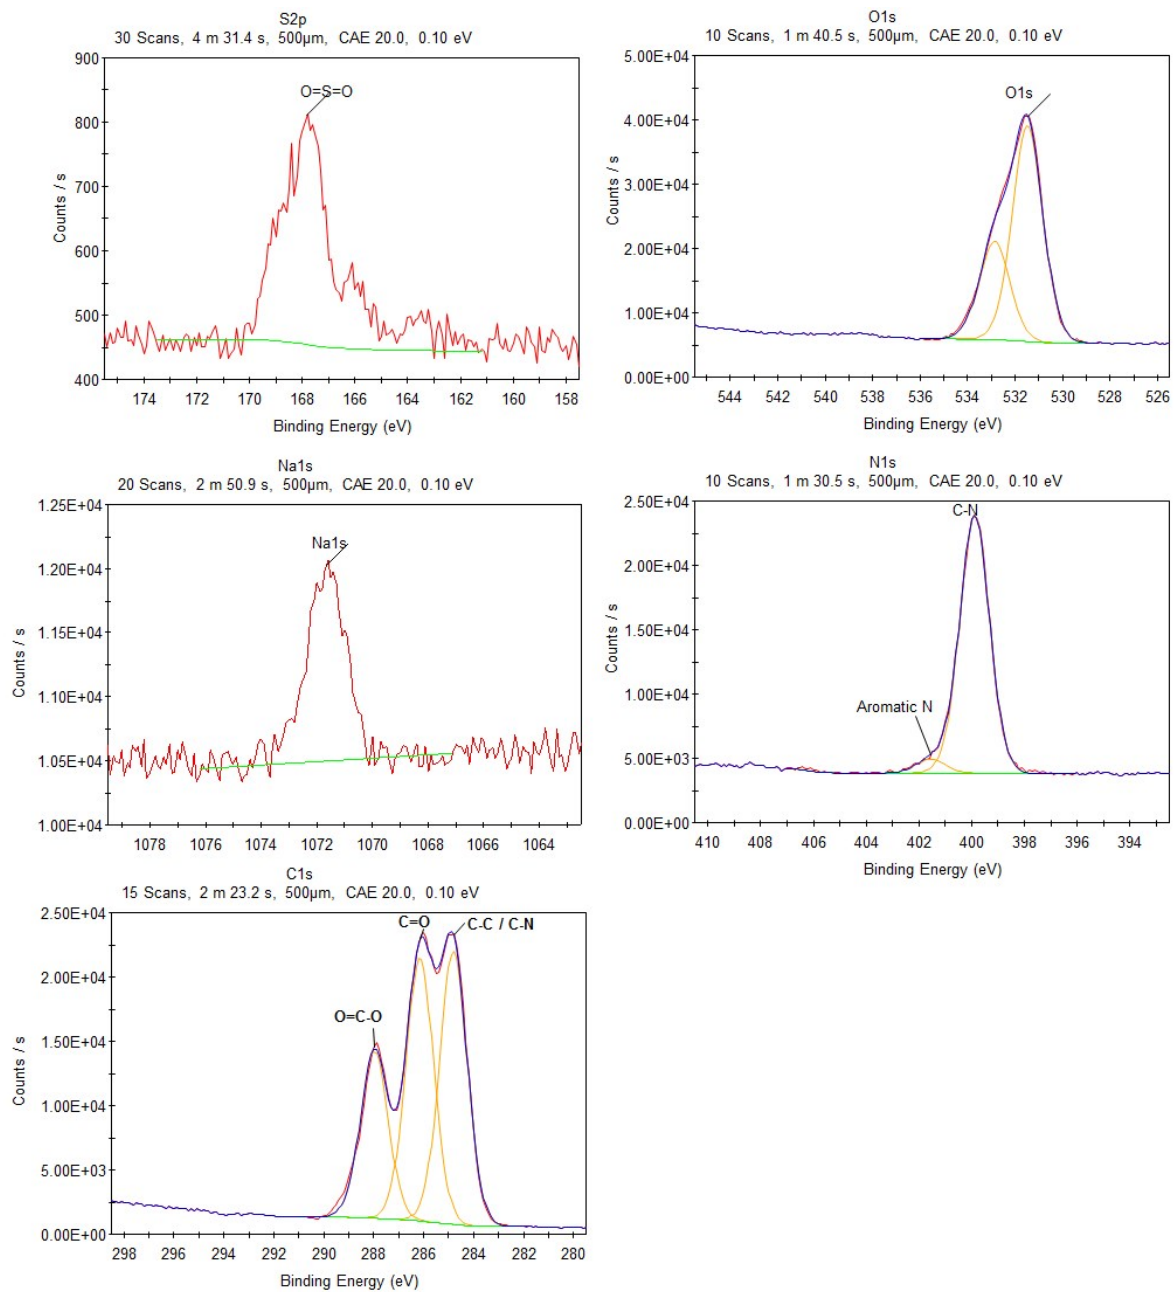

**(b) Gelatin- silver nanocomposites (G-Ag)**

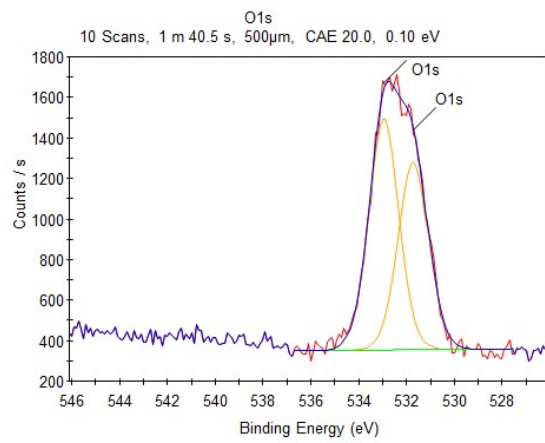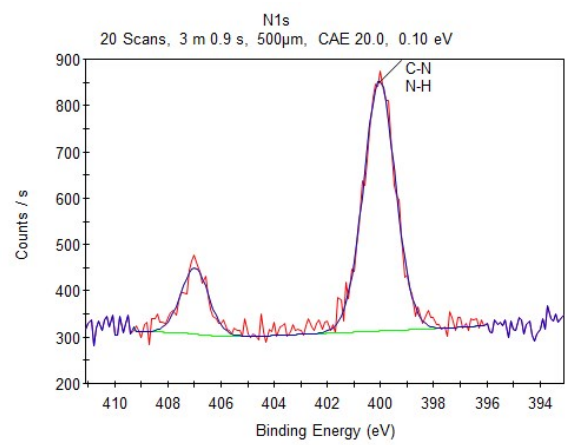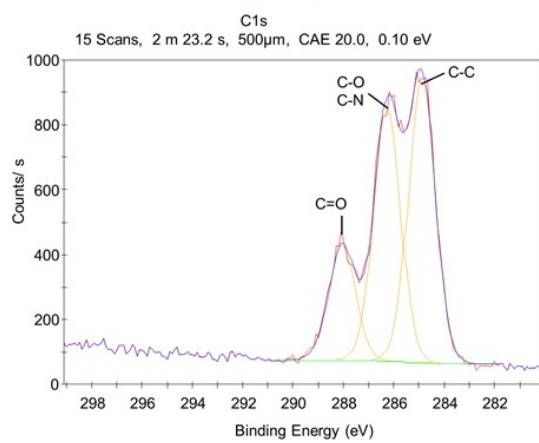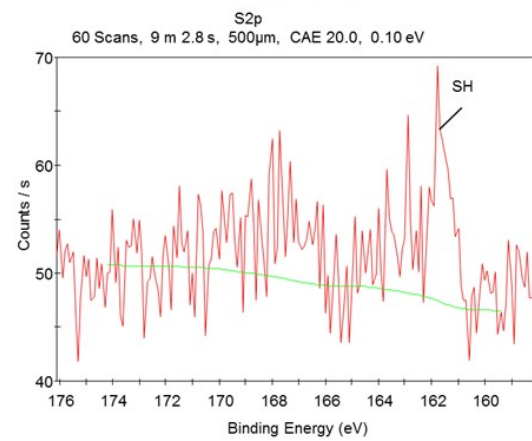

**(c) Silk fibroin- silver nanocomposites (RSF-Ag)**

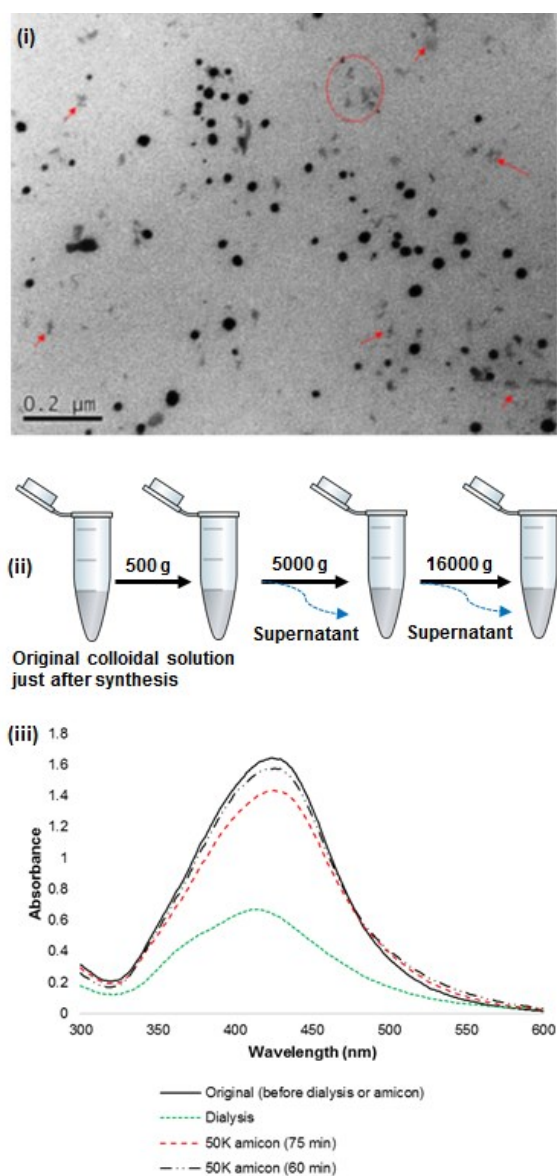

**Figure S4:** i) Representative TEM image of a nanosilver composite showing the debris associated with particles before purification; ii) Schematic of differential centrifugation protocol adopted to clean the particle preparations and obtain a largely monodisperse population of particles; iii) UV- vis spectrum indicating effects of different purification and/or concentration techniques on the composites (spectral curves representing Amicon centrifugation were obtained after dilution of sample in 1:50).

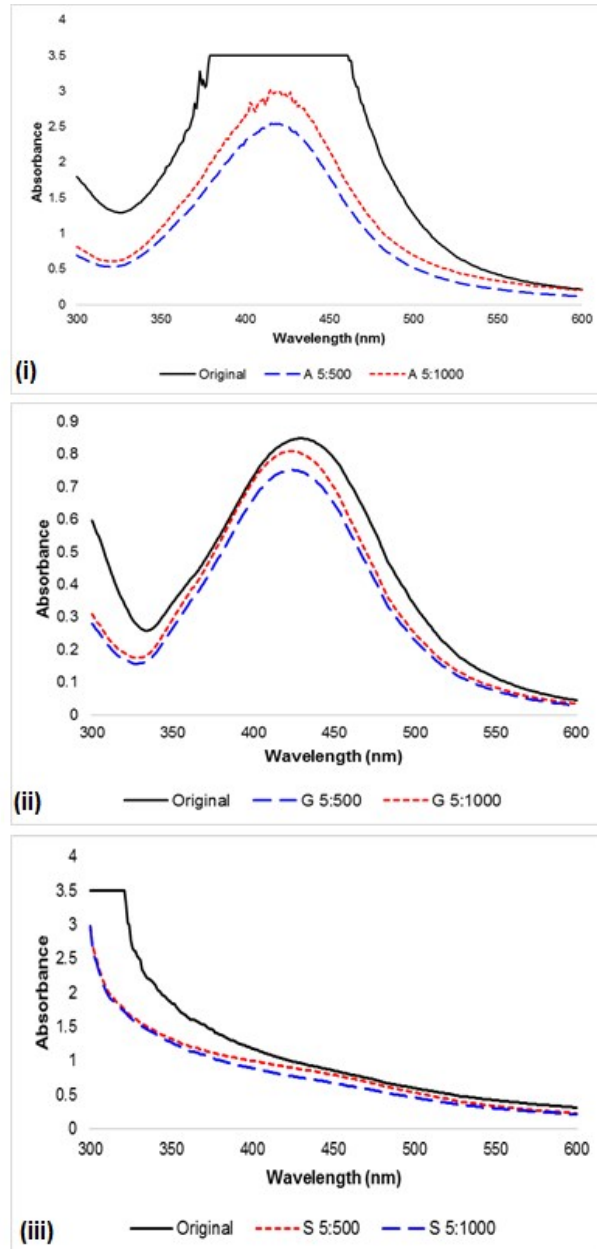

**Figure S5:** UV-visible spectra of dialyzed and undialyzed nanocomposites against two different buffer volumes with Pur-A-Lyser dialysis tubes. ; i) Algininate, ii) Gelatin, iii) Silk Fibroin



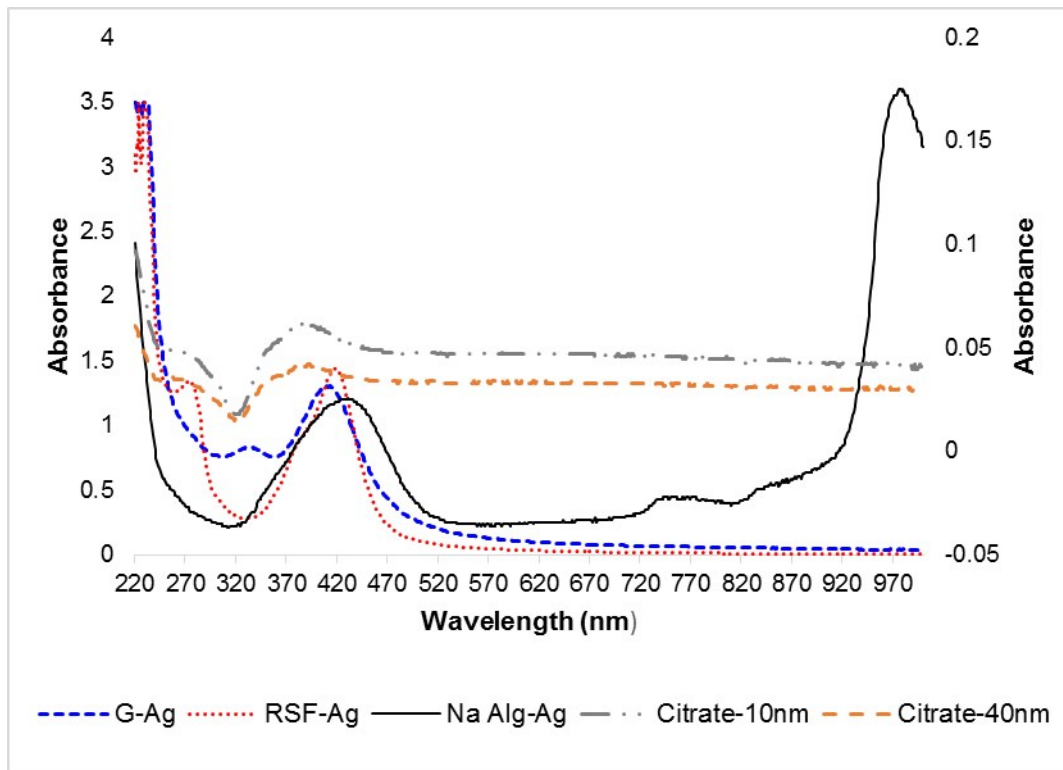

**Figure S6:** UV-vis spectral profile indicating behaviour of different nanoparticles in PBS (pH 7.4).

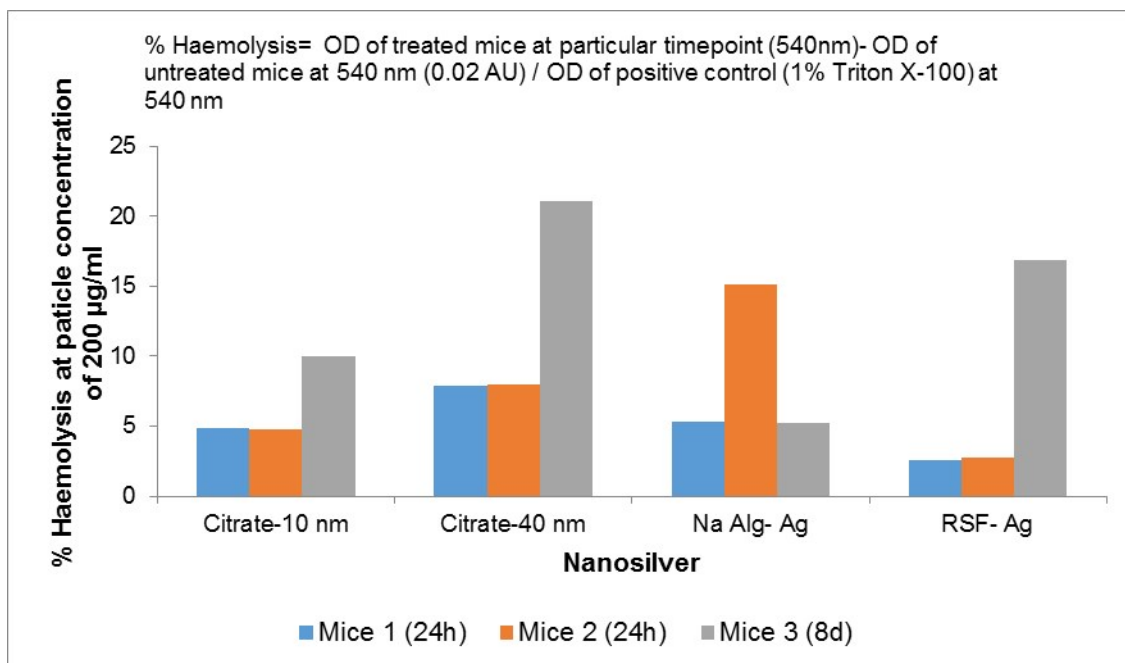

**Figure S7:** Haemolytic activity of different particles in mouse blood (blood was withdrawn from the thoracic cavity post treatment period and euthanization of animals)
