# Supplementary material for: In vitro coronal protein signatures and biological impact of silver nanoparticles synthesized with different natural polymers as capping agents
Source: PubMed Central journal article supplement (PMC9418127; doi:10.1039/d0na01013h), 2021-05-17
Supplement: NA-003-D0NA01013H-s002.pdf [file NA-003-D0NA01013H-s002.pdf]

**Na-Ag Alg**

**Supplementary File**

**Accession**

**Protein Name**

|                    |                                                                                 |
|--------------------|---------------------------------------------------------------------------------|
| ALBU_HUMAN         | Serum albumin OS=Homo sapiens GN=ALB PE=1 SV=2                                  |
| CO3_HUMAN          | Complement C3 OS=Homo sapiens GN=C3 PE=1 SV=2                                   |
| TRFE_HUMAN         | Serotransferrin OS=Homo sapiens GN=TF PE=1 SV=3                                 |
| FIBB_HUMAN         | Fibrinogen beta chain OS=Homo sapiens GN=FGB PE=1 SV=2                          |
| FIBA_HUMAN         | Fibrinogen alpha chain OS=Homo sapiens GN=FGA PE=1 SV=2                         |
| <b>APOA1_HUMAN</b> | <b>Apolipoprotein A-I OS=Homo sapiens GN=APOA1 PE=1 SV=1</b>                    |
| A1AT_HUMAN         | Alpha-1-antitrypsin OS=Homo sapiens GN=SERPINA1 PE=1 SV=3                       |
| FIBG_HUMAN         | Fibrinogen gamma chain OS=Homo sapiens GN=FGG PE=1 SV=3                         |
| HPT_HUMAN          | Haptoglobin OS=Homo sapiens GN=HP PE=1 SV=1                                     |
| CERU_HUMAN         | Ceruloplasmin OS=Homo sapiens GN=CP PE=1 SV=1                                   |
| TLN1_HUMAN         | Talin-1 OS=Homo sapiens GN=TLN1 PE=1 SV=3                                       |
| APOA4_HUMAN        | Apolipoprotein A-IV OS=Homo sapiens GN=APOA4 PE=1 SV=3                          |
| IGHM_HUMAN         | Immunoglobulin heavy constant mu OS=Homo sapiens GN=IGHM PE=1 SV=4              |
| CO4B_HUMAN         | Complement C4-B OS=Homo sapiens GN=C4B PE=1 SV=2                                |
| TRY1_HUMAN         | Trypsin-1 OS=Homo sapiens GN=PRSS1 PE=1 SV=1                                    |
| ITIH2_HUMAN        | Inter-alpha-trypsin inhibitor heavy chain H2 OS=Homo sapiens GN=ITIH2 PE=1 SV=2 |
| ITIH4_HUMAN        | Inter-alpha-trypsin inhibitor heavy chain H4 OS=Homo sapiens GN=ITIH4 PE=1 SV=4 |
| IGG1_HUMAN         | Immunoglobulin gamma-1 heavy chain OS=Homo sapiens PE=1 SV=1                    |
| HEMO_HUMAN         | Hemopexin OS=Homo sapiens GN=HPX PE=1 SV=2                                      |
| FLNA_HUMAN         | Filamin-A OS=Homo sapiens GN=FLNA PE=1 SV=4                                     |
| FINC_HUMAN         | Fibronectin OS=Homo sapiens GN=FN1 PE=1 SV=4                                    |
| MYH9_HUMAN         | Myosin-9 OS=Homo sapiens GN=MYH9 PE=1 SV=4                                      |
| ACTB_HUMAN         | Actin, cytoplasmic 1 OS=Homo sapiens GN=ACTB PE=1 SV=1                          |
| GELS_HUMAN         | Gelsolin OS=Homo sapiens GN=GSN PE=1 SV=1                                       |
| PLMN_HUMAN         | Plasminogen OS=Homo sapiens GN=PLG PE=1 SV=2                                    |
| CFAB_HUMAN         | Complement factor B OS=Homo sapiens GN=CFB PE=1 SV=2                            |
| HBA_HUMAN          | Hemoglobin subunit alpha OS=Homo sapiens GN=HBA1 PE=1 SV=2                      |
| KNG1_HUMAN         | Kininogen-1 OS=Homo sapiens GN=KNG1 PE=1 SV=2                                   |
| APOE_HUMAN         | Apolipoprotein E OS=Homo sapiens GN=APOE PE=1 SV=1                              |
| HEP2_HUMAN         | Heparin cofactor 2 OS=Homo sapiens GN=SERPIND1 PE=1 SV=3                        |
| HBD_HUMAN          | Hemoglobin subunit delta OS=Homo sapiens GN=HBD PE=1 SV=2                       |
| VTNC_HUMAN         | Vitronectin OS=Homo sapiens GN=VTN PE=1 SV=1                                    |
| APOA2_HUMAN        | Apolipoprotein A-II OS=Homo sapiens GN=APOA2 PE=1 SV=1                          |
| HBB_HUMAN          | Hemoglobin subunit beta OS=Homo sapiens GN=HBB PE=1 SV=2                        |

|             |                                                                          |
|-------------|--------------------------------------------------------------------------|
| PON1_HUMAN  | Serum paraoxonase/arylesterase 1 OS=Homo sapiens GN=PON1 PE=1 SV=3       |
| FETUA_HUMAN | Alpha-2-HS-glycoprotein OS=Homo sapiens GN=AHSG PE=1 SV=1                |
| IGHA1_HUMAN | Immunoglobulin heavy constant alpha 1 OS=Homo sapiens GN=IGHA1 PE=1 SV=2 |
| IGHG4_HUMAN | Immunoglobulin heavy constant gamma 4 OS=Homo sapiens GN=IGHG4 PE=1 SV=1 |
| CLUS_HUMAN  | Clusterin OS=Homo sapiens GN=CLU PE=1 SV=1                               |
| IGL1_HUMAN  | Immunoglobulin lambda-1 light chain OS=Homo sapiens PE=1 SV=1            |
| IGK_HUMAN   | Immunoglobulin kappa light chain OS=Homo sapiens PE=1 SV=1               |
| HRG_HUMAN   | Histidine-rich glycoprotein OS=Homo sapiens GN=HRG PE=1 SV=1             |
| C1R_HUMAN   | Complement C1r subcomponent OS=Homo sapiens GN=C1R PE=1 SV=2             |
| A1AG2_HUMAN | Alpha-1-acid glycoprotein 2 OS=Homo sapiens GN=ORM2 PE=1 SV=2            |
| APOH_HUMAN  | Beta-2-glycoprotein 1 OS=Homo sapiens GN=APOH PE=1 SV=3                  |
| APOL1_HUMAN | Apolipoprotein L1 OS=Homo sapiens GN=APOL1 PE=1 SV=5                     |
| APOC3_HUMAN | Apolipoprotein C-III OS=Homo sapiens GN=APOC3 PE=1 SV=1                  |
| AMBP_HUMAN  | Protein AMBP OS=Homo sapiens GN=AMBP PE=1 SV=1                           |
| ITA2B_HUMAN | Integrin alpha-IIb OS=Homo sapiens GN=ITGA2B PE=1 SV=3                   |
| F13A_HUMAN  | Coagulation factor XIII A chain OS=Homo sapiens GN=F13A1 PE=1 SV=4       |
| APOC2_HUMAN | Apolipoprotein C-II OS=Homo sapiens GN=APOC2 PE=1 SV=1                   |
| VINC_HUMAN  | Vinculin OS=Homo sapiens GN=VCL PE=1 SV=4                                |
| PGRP2_HUMAN | N-acetylmuramoyl-L-alanine amidase OS=Homo sapiens GN=PGLYRP2 PE=1 SV=1  |
| IGHG3_HUMAN | Immunoglobulin heavy constant gamma 3 OS=Homo sapiens GN=IGHG3 PE=1 SV=2 |
| 1433Z_HUMAN | 14-3-3 protein zeta/delta OS=Homo sapiens GN=YWHAZ PE=1 SV=1             |
| TSP1_HUMAN  | Thrombospondin-1 OS=Homo sapiens GN=THBS1 PE=1 SV=2                      |
| A2AP_HUMAN  | Alpha-2-antiplasmin OS=Homo sapiens GN=SERPINF2 PE=1 SV=3                |
| ITB3_HUMAN  | Integrin beta-3 OS=Homo sapiens GN=ITGB3 PE=1 SV=2                       |
| IGKC_HUMAN  | Immunoglobulin kappa constant OS=Homo sapiens GN=IGKC PE=1 SV=2          |
| TPM4_HUMAN  | Tropomyosin alpha-4 chain OS=Homo sapiens GN=TPM4 PE=1 SV=3              |
| B3AT_HUMAN  | Band 3 anion transport protein OS=Homo sapiens GN=SLC4A1 PE=1 SV=3       |
| ACTN1_HUMAN | Alpha-actinin-1 OS=Homo sapiens GN=ACTN1 PE=1 SV=2                       |
| C4BPA_HUMAN | C4b-binding protein alpha chain OS=Homo sapiens GN=C4BPA PE=1 SV=2       |
| AFAM_HUMAN  | Afamin OS=Homo sapiens GN=AFM PE=1 SV=1                                  |
| IGHG2_HUMAN | Immunoglobulin heavy constant gamma 2 OS=Homo sapiens GN=IGHG2 PE=1 SV=2 |
| FCN3_HUMAN  | Ficolin-3 OS=Homo sapiens GN=FCN3 PE=1 SV=2                              |
| PROS_HUMAN  | Vitamin K-dependent protein S OS=Homo sapiens GN=PROS1 PE=1 SV=1         |
| APOC1_HUMAN | Apolipoprotein C-I OS=Homo sapiens GN=APOC1 PE=1 SV=1                    |
| IGLC2_HUMAN | Immunoglobulin lambda constant 2 OS=Homo sapiens GN=IGLC2 PE=1 SV=1      |
| HPTR_HUMAN  | Haptoglobin-related protein OS=Homo sapiens GN=HPR PE=2 SV=2             |
| A1AG1_HUMAN | Alpha-1-acid glycoprotein 1 OS=Homo sapiens GN=ORM1 PE=1 SV=1            |

|              |                                                                                |
|--------------|--------------------------------------------------------------------------------|
| C1QB_HUMAN   | Complement C1q subcomponent subunit B OS=Homo sapiens GN=C1QB PE=1 SV=3        |
| URP2_HUMAN   | Fermitin family homolog 3 OS=Homo sapiens GN=FERMT3 PE=1 SV=1                  |
| APOA_HUMAN   | Apolipoprotein(a) OS=Homo sapiens GN=LPA PE=1 SV=1                             |
| TBB1_HUMAN   | Tubulin beta-1 chain OS=Homo sapiens GN=TUBB1 PE=1 SV=1                        |
| PRDX2_HUMAN  | Peroxiredoxin-2 OS=Homo sapiens GN=PRDX2 PE=1 SV=5                             |
| RAP1B_HUMAN  | Ras-related protein Rap-1b OS=Homo sapiens GN=RAP1B PE=1 SV=1                  |
| CD5L_HUMAN   | CD5 antigen-like OS=Homo sapiens GN=CD5L PE=1 SV=1                             |
| TBA4A_HUMAN  | Tubulin alpha-4A chain OS=Homo sapiens GN=TUBA4A PE=1 SV=1                     |
| SPTB1_HUMAN  | <b>Spectrin beta chain, erythrocytic OS=Homo sapiens GN=SPTB PE=1 SV=5</b>     |
| C1QA_HUMAN   | Complement C1q subcomponent subunit A OS=Homo sapiens GN=C1QA PE=1 SV=2        |
| G3P_HUMAN    | Glyceraldehyde-3-phosphate dehydrogenase OS=Homo sapiens GN=GAPDH PE=1 SV=3    |
| TAGL2_HUMAN  | Transgelin-2 OS=Homo sapiens GN=TAGLN2 PE=1 SV=3                               |
| SPTA1_HUMAN  | <b>Spectrin alpha chain, erythrocytic 1 OS=Homo sapiens GN=SPTA1 PE=1 SV=5</b> |
| ZPI_HUMAN    | Protein Z-dependent protease inhibitor OS=Homo sapiens GN=SERPINA10 PE=1 SV=1  |
| PROF1_HUMAN  | Profilin-1 OS=Homo sapiens GN=PFN1 PE=1 SV=2                                   |
| IGA2_HUMAN   | Immunoglobulin alpha-2 heavy chain OS=Homo sapiens PE=1 SV=1                   |
| STOM_HUMAN   | Erythrocyte band 7 integral membrane protein OS=Homo sapiens GN=STOM PE=1 SV=3 |
| IGJ_HUMAN    | Immunoglobulin J chain OS=Homo sapiens GN=JCHAIN PE=1 SV=4                     |
| COF1_HUMAN   | Cofilin-1 OS=Homo sapiens GN=CFL1 PE=1 SV=3                                    |
| C1QC_HUMAN   | Complement C1q subcomponent subunit C OS=Homo sapiens GN=C1QC PE=1 SV=3        |
| ENOA_HUMAN   | Alpha-enolase OS=Homo sapiens GN=ENO1 PE=1 SV=2                                |
| MYL6_HUMAN   | Myosin light polypeptide 6 OS=Homo sapiens GN=MYL6 PE=1 SV=2                   |
| KPYM_HUMAN   | Pyruvate kinase PKM OS=Homo sapiens GN=PKM PE=1 SV=4                           |
| CXCL7_HUMAN  | Platelet basic protein OS=Homo sapiens GN=PPBP PE=1 SV=3                       |
| SAA4_HUMAN   | Serum amyloid A-4 protein OS=Homo sapiens GN=SAA4 PE=1 SV=2                    |
| KV320_HUMAN  | Immunoglobulin kappa variable 3-20 OS=Homo sapiens GN=IGKV3-20 PE=1 SV=2       |
| S10A8_HUMAN  | Protein S100-A8 OS=Homo sapiens GN=S100A8 PE=1 SV=1                            |
| ML12A_HUMAN  | Myosin regulatory light chain 12A OS=Homo sapiens GN=MYL12A PE=1 SV=2          |
| HABP2_HUMAN  | Hyaluronan-binding protein 2 OS=Homo sapiens GN=HABP2 PE=1 SV=1                |
| PRG4_HUMAN   | Proteoglycan 4 OS=Homo sapiens GN=PRG4 PE=1 SV=2                               |
| MOES_HUMAN   | Moesin OS=Homo sapiens GN=MSN PE=1 SV=3                                        |
| CAVIN2_HUMAN | Caveolae-associated protein 2 OS=Homo sapiens GN=CAVIN2 PE=1 SV=3              |
| CAP1_HUMAN   | Adenylyl cyclase-associated protein 1 OS=Homo sapiens GN=CAP1 PE=1 SV=5        |
| GP1BA_HUMAN  | Platelet glycoprotein Ib alpha chain OS=Homo sapiens GN=GP1BA PE=1 SV=2        |
| ILK_HUMAN    | Integrin-linked protein kinase OS=Homo sapiens GN=ILK PE=1 SV=2                |
| LDHB_HUMAN   | L-lactate dehydrogenase B chain OS=Homo sapiens GN=LDHB PE=1 SV=2              |
| ALDOA_HUMAN  | Fructose-bisphosphate aldolase A OS=Homo sapiens GN=ALDOA PE=1 SV=2            |

PLEK\_HUMAN Pleckstrin OS=Homo sapiens GN=PLEK PE=1 SV=3  
 PLF4\_HUMAN Platelet factor 4 OS=Homo sapiens GN=PF4 PE=1 SV=2  
 PPIA\_HUMAN Peptidyl-prolyl cis-trans isomerase A OS=Homo sapiens GN=PPIA PE=1 SV=2  
 HSP7C\_HUMAN Heat shock cognate 71 kDa protein OS=Homo sapiens GN=HSPA8 PE=1 SV=1  
 GTR14\_HUMAN Solute carrier family 2, facilitated glucose transporter member 14 OS=Homo sapiens GN=SLC2A14 PE=2 SV=1  
 HV374\_HUMAN Immunoglobulin heavy variable 3-74 OS=Homo sapiens GN=IGHV3-74 PE=3 SV=1  
 COR1A\_HUMAN Coronin-1A OS=Homo sapiens GN=CORO1A PE=1 SV=4  
 TBB5\_HUMAN Tubulin beta chain OS=Homo sapiens GN=TUBB PE=1 SV=2  
 RSU1\_HUMAN Ras suppressor protein 1 OS=Homo sapiens GN=RSU1 PE=1 SV=3  
 CATA\_HUMAN Catalase OS=Homo sapiens GN=CAT PE=1 SV=3  
 TYB4\_HUMAN Thymosin beta-4 OS=Homo sapiens GN=TMSB4X PE=1 SV=2  
 GP1BB\_HUMAN Platelet glycoprotein Ib beta chain OS=Homo sapiens GN=GP1BB PE=1 SV=1  
 KV401\_HUMAN Immunoglobulin kappa variable 4-1 OS=Homo sapiens GN=IGKV4-1 PE=1 SV=1  
 H2B1B\_HUMAN Histone H2B type 1-B OS=Homo sapiens GN=HIST1H2BB PE=1 SV=2  
 1433E\_HUMAN 14-3-3 protein epsilon OS=Homo sapiens GN=YWHAE PE=1 SV=1  
 1B35\_HUMAN HLA class I histocompatibility antigen, B-35 alpha chain OS=Homo sapiens GN=HLA-B PE=1 SV=1  
 CAH1\_HUMAN Carbonic anhydrase 1 OS=Homo sapiens GN=CA1 PE=1 SV=2  
 WDR1\_HUMAN WD repeat-containing protein 1 OS=Homo sapiens GN=WDR1 PE=1 SV=4  
 KV230\_HUMAN Immunoglobulin kappa variable 2-30 OS=Homo sapiens GN=IGKV2-30 PE=3 SV=2  
 KV315\_HUMAN Immunoglobulin kappa variable 3-15 OS=Homo sapiens GN=IGKV3-15 PE=1 SV=2  
 ANK1\_HUMAN Ankyrin-1 OS=Homo sapiens GN=ANK1 PE=1 SV=3  
 CRAC1\_HUMAN Cartilage acidic protein 1 OS=Homo sapiens GN=CRTAC1 PE=1 SV=2  
 GSTO1\_HUMAN Glutathione S-transferase omega-1 OS=Homo sapiens GN=GSTO1 PE=1 SV=2  
 BIN2\_HUMAN Bridging integrator 2 OS=Homo sapiens GN=BIN2 PE=1 SV=3  
 HV434\_HUMAN Immunoglobulin heavy variable 4-34 OS=Homo sapiens GN=IGHV4-34 PE=1 SV=2  
 PDIA3\_HUMAN Protein disulfide-isomerase A3 OS=Homo sapiens GN=PDIA3 PE=1 SV=4  
 B2MG\_HUMAN Beta-2-microglobulin OS=Homo sapiens GN=B2M PE=1 SV=1  
 TPIS\_HUMAN Triosephosphate isomerase OS=Homo sapiens GN=TPI1 PE=1 SV=3  
 GTR1\_HUMAN Solute carrier family 2, facilitated glucose transporter member 1 OS=Homo sapiens GN=SLC2A1 PE=1 SV=2  
 GPIX\_HUMAN Platelet glycoprotein IX OS=Homo sapiens GN=GP9 PE=1 SV=3  
 TERA\_HUMAN Transitional endoplasmic reticulum ATPase OS=Homo sapiens GN=VCP PE=1 SV=4  
 ZYX\_HUMAN Zyxin OS=Homo sapiens GN=ZYX PE=1 SV=1  
 PGK1\_HUMAN Phosphoglycerate kinase 1 OS=Homo sapiens GN=PGK1 PE=1 SV=3  
 PRDX6\_HUMAN Peroxiredoxin-6 OS=Homo sapiens GN=PRDX6 PE=1 SV=3  
 RAB1B\_HUMAN Ras-related protein Rab-1B OS=Homo sapiens GN=RAB1B PE=1 SV=1  
 PNP\_HUMAN Purine nucleoside phosphorylase OS=Homo sapiens GN=PNP PE=1 SV=2  
 VASP\_HUMAN Vasodilator-stimulated phosphoprotein OS=Homo sapiens GN=VASP PE=1 SV=3

|              |                                                                                                    |
|--------------|----------------------------------------------------------------------------------------------------|
| 1433G_HUMAN  | 14-3-3 protein gamma OS=Homo sapiens GN=YWHAG PE=1 SV=2                                            |
| CALR_HUMAN   | Calreticulin OS=Homo sapiens GN=CALR PE=1 SV=1                                                     |
| TRFL_HUMAN   | Lactotransferrin OS=Homo sapiens GN=LTF PE=1 SV=6                                                  |
| COR1C_HUMAN  | Coronin-1C OS=Homo sapiens GN=CORO1C PE=1 SV=1                                                     |
| K2C1_HUMAN   | Keratin, type II cytoskeletal 1 OS=Homo sapiens GN=KRT1 PE=1 SV=6                                  |
| ARF1_HUMAN   | ADP-ribosylation factor 1 OS=Homo sapiens GN=ARF1 PE=1 SV=2                                        |
| CAZA1_HUMAN  | F-actin-capping protein subunit alpha-1 OS=Homo sapiens GN=CAPZA1 PE=1 SV=3                        |
| PDL1_HUMAN   | PDZ and LIM domain protein 1 OS=Homo sapiens GN=PDLIM1 PE=1 SV=4                                   |
| EEF1A1_HUMAN | Elongation factor 1-alpha 1 OS=Homo sapiens GN=EEF1A1 PE=1 SV=1                                    |
| RB11A_HUMAN  | Ras-related protein Rab-11A OS=Homo sapiens GN=RAB11A PE=1 SV=3                                    |
| K1C10_HUMAN  | Keratin, type I cytoskeletal 10 OS=Homo sapiens GN=KRT10 PE=1 SV=6                                 |
| LDHA_HUMAN   | L-lactate dehydrogenase A chain OS=Homo sapiens GN=LDHA PE=1 SV=2                                  |
| GBB1_HUMAN   | Guanine nucleotide-binding protein G(I)/G(S)/G(T) subunit beta-1 OS=Homo sapiens GN=GNB1 PE=1 SV=3 |
| TUBA1B_HUMAN | Tubulin alpha-1B chain OS=Homo sapiens GN=TUBA1B PE=1 SV=1                                         |
| CALM1_HUMAN  | Calmodulin-1 OS=Homo sapiens GN=CALM1 PE=1 SV=1                                                    |
| LEGL_HUMAN   | Galectin-related protein OS=Homo sapiens GN=LGALS1 PE=1 SV=2                                       |
| H4_HUMAN     | Histone H4 OS=Homo sapiens GN=HIST1H4A PE=1 SV=2                                                   |
| CAN1_HUMAN   | Calpain-1 catalytic subunit OS=Homo sapiens GN=CAPN1 PE=1 SV=1                                     |
| BLVRB_HUMAN  | Flavin reductase (NADPH) OS=Homo sapiens GN=BLVRB PE=1 SV=3                                        |
| HEM2_HUMAN   | Delta-aminolevulinic acid dehydratase OS=Homo sapiens GN=ALAD PE=1 SV=1                            |
| ARPC4_HUMAN  | Actin-related protein 2/3 complex subunit 4 OS=Homo sapiens GN=ARPC4 PE=1 SV=3                     |

## G- AgNP

| Accession          | Protein Name                                                 |
|--------------------|--------------------------------------------------------------|
| ALBU_HUMAN         | Serum albumin OS=Homo sapiens GN=ALB PE=1 SV=2               |
| CO3_HUMAN          | Complement C3 OS=Homo sapiens GN=C3 PE=1 SV=2                |
| TRFE_HUMAN         | Serotransferrin OS=Homo sapiens GN=TF PE=1 SV=3              |
| FIBB_HUMAN         | Fibrinogen beta chain OS=Homo sapiens GN=FGB PE=1 SV=2       |
| A2MG_HUMAN         | Alpha-2-macroglobulin OS=Homo sapiens GN=A2M PE=1 SV=3       |
| FIBA_HUMAN         | Fibrinogen alpha chain OS=Homo sapiens GN=FGA PE=1 SV=2      |
| <b>APOA1_HUMAN</b> | <b>Apolipoprotein A-I OS=Homo sapiens GN=APOA1 PE=1 SV=1</b> |
| A1AT_HUMAN         | Alpha-1-antitrypsin OS=Homo sapiens GN=SERPINA1 PE=1 SV=3    |
| FIBG_HUMAN         | Fibrinogen gamma chain OS=Homo sapiens GN=FGG PE=1 SV=3      |
| HPT_HUMAN          | Haptoglobin OS=Homo sapiens GN=HP PE=1 SV=1                  |
| CERU_HUMAN         | Ceruloplasmin OS=Homo sapiens GN=CP PE=1 SV=1                |
| TLN1_HUMAN         | Talin-1 OS=Homo sapiens GN=TLN1 PE=1 SV=3                    |

|             |                                                                                 |
|-------------|---------------------------------------------------------------------------------|
| APOA4_HUMAN | Apolipoprotein A-IV OS=Homo sapiens GN=APOA4 PE=1 SV=3                          |
| CFAH_HUMAN  | Complement factor H OS=Homo sapiens GN=CFH PE=1 SV=4                            |
| IGHM_HUMAN  | Immunoglobulin heavy constant mu OS=Homo sapiens GN=IGHM PE=1 SV=4              |
| CO4B_HUMAN  | Complement C4-B OS=Homo sapiens GN=C4B PE=1 SV=2                                |
| TRY1_HUMAN  | Trypsin-1 OS=Homo sapiens GN=PRSS1 PE=1 SV=1                                    |
| ITIH2_HUMAN | Inter-alpha-trypsin inhibitor heavy chain H2 OS=Homo sapiens GN=ITIH2 PE=1 SV=2 |
| ITIH4_HUMAN | Inter-alpha-trypsin inhibitor heavy chain H4 OS=Homo sapiens GN=ITIH4 PE=1 SV=4 |
| IGG1_HUMAN  | Immunoglobulin gamma-1 heavy chain OS=Homo sapiens PE=1 SV=1                    |
| HEMO_HUMAN  | Hemopexin OS=Homo sapiens GN=HPX PE=1 SV=2                                      |
| FLNA_HUMAN  | Filamin-A OS=Homo sapiens GN=FLNA PE=1 SV=4                                     |
| ANT3_HUMAN  | Antithrombin-III OS=Homo sapiens GN=SERPINC1 PE=1 SV=1                          |
| FINC_HUMAN  | Fibronectin OS=Homo sapiens GN=FN1 PE=1 SV=4                                    |
| MYH9_HUMAN  | Myosin-9 OS=Homo sapiens GN=MYH9 PE=1 SV=4                                      |
| ACTB_HUMAN  | Actin, cytoplasmic 1 OS=Homo sapiens GN=ACTB PE=1 SV=1                          |
| GELS_HUMAN  | Gelsolin OS=Homo sapiens GN=GSN PE=1 SV=1                                       |
| PLMN_HUMAN  | Plasminogen OS=Homo sapiens GN=PLG PE=1 SV=2                                    |
| HBA_HUMAN   | Hemoglobin subunit alpha OS=Homo sapiens GN=HBA1 PE=1 SV=2                      |
| KNG1_HUMAN  | Kininogen-1 OS=Homo sapiens GN=KNG1 PE=1 SV=2                                   |
| APOE_HUMAN  | Apolipoprotein E OS=Homo sapiens GN=APOE PE=1 SV=1                              |
| HEP2_HUMAN  | Heparin cofactor 2 OS=Homo sapiens GN=SERPIND1 PE=1 SV=3                        |
| HBD_HUMAN   | Hemoglobin subunit delta OS=Homo sapiens GN=HBD PE=1 SV=2                       |
| VTNC_HUMAN  | Vitronectin OS=Homo sapiens GN=VTN PE=1 SV=1                                    |
| APOA2_HUMAN | Apolipoprotein A-II OS=Homo sapiens GN=APOA2 PE=1 SV=1                          |
| HBB_HUMAN   | Hemoglobin subunit beta OS=Homo sapiens GN=HBB PE=1 SV=2                        |
| PON1_HUMAN  | Serum paraoxonase/arylesterase 1 OS=Homo sapiens GN=PON1 PE=1 SV=3              |
| FETUA_HUMAN | Alpha-2-HS-glycoprotein OS=Homo sapiens GN=AHSG PE=1 SV=1                       |
| AACT_HUMAN  | Alpha-1-antichymotrypsin OS=Homo sapiens GN=SERPINA3 PE=1 SV=2                  |
| IGHA1_HUMAN | Immunoglobulin heavy constant alpha 1 OS=Homo sapiens GN=IGHA1 PE=1 SV=2        |
| IGHG4_HUMAN | Immunoglobulin heavy constant gamma 4 OS=Homo sapiens GN=IGHG4 PE=1 SV=1        |
| CLUS_HUMAN  | Clusterin OS=Homo sapiens GN=CLU PE=1 SV=1                                      |
| IGL1_HUMAN  | Immunoglobulin lambda-1 light chain OS=Homo sapiens PE=1 SV=1                   |
| IGK_HUMAN   | Immunoglobulin kappa light chain OS=Homo sapiens PE=1 SV=1                      |
| A1BG_HUMAN  | Alpha-1B-glycoprotein OS=Homo sapiens GN=A1BG PE=1 SV=4                         |
| HRG_HUMAN   | Histidine-rich glycoprotein OS=Homo sapiens GN=HRG PE=1 SV=1                    |
| C1R_HUMAN   | Complement C1r subcomponent OS=Homo sapiens GN=C1R PE=1 SV=2                    |
| A1AG2_HUMAN | Alpha-1-acid glycoprotein 2 OS=Homo sapiens GN=ORM2 PE=1 SV=2                   |
| APOH_HUMAN  | Beta-2-glycoprotein 1 OS=Homo sapiens GN=APOH PE=1 SV=3                         |

|             |                                                                          |
|-------------|--------------------------------------------------------------------------|
| KLKB1_HUMAN | Plasma kallikrein OS=Homo sapiens GN=KLKB1 PE=1 SV=1                     |
| APOL1_HUMAN | Apolipoprotein L1 OS=Homo sapiens GN=APOL1 PE=1 SV=5                     |
| APOC3_HUMAN | Apolipoprotein C-III OS=Homo sapiens GN=APOC3 PE=1 SV=1                  |
| AMBP_HUMAN  | Protein AMBP OS=Homo sapiens GN=AMBP PE=1 SV=1                           |
| ITA2B_HUMAN | Integrin alpha-IIb OS=Homo sapiens GN=ITGA2B PE=1 SV=3                   |
| F13A_HUMAN  | Coagulation factor XIII A chain OS=Homo sapiens GN=F13A1 PE=1 SV=4       |
| APOC2_HUMAN | Apolipoprotein C-II OS=Homo sapiens GN=APOC2 PE=1 SV=1                   |
| VINC_HUMAN  | Vinculin OS=Homo sapiens GN=VCL PE=1 SV=4                                |
| PGRP2_HUMAN | N-acetylmuramoyl-L-alanine amidase OS=Homo sapiens GN=PGLYRP2 PE=1 SV=1  |
| IGHG3_HUMAN | Immunoglobulin heavy constant gamma 3 OS=Homo sapiens GN=IGHG3 PE=1 SV=2 |
| 1433Z_HUMAN | 14-3-3 protein zeta/delta OS=Homo sapiens GN=YWHAZ PE=1 SV=1             |
| TSP1_HUMAN  | Thrombospondin-1 OS=Homo sapiens GN=THBS1 PE=1 SV=2                      |
| A2AP_HUMAN  | Alpha-2-antiplasmin OS=Homo sapiens GN=SERPINF2 PE=1 SV=3                |
| ITB3_HUMAN  | Integrin beta-3 OS=Homo sapiens GN=ITGB3 PE=1 SV=2                       |
| PEDF_HUMAN  | Pigment epithelium-derived factor OS=Homo sapiens GN=SERPINF1 PE=1 SV=4  |
| IGKC_HUMAN  | Immunoglobulin kappa constant OS=Homo sapiens GN=IGKC PE=1 SV=2          |
| TPM4_HUMAN  | Tropomyosin alpha-4 chain OS=Homo sapiens GN=TPM4 PE=1 SV=3              |
| B3AT_HUMAN  | Band 3 anion transport protein OS=Homo sapiens GN=SLC4A1 PE=1 SV=3       |
| ACTN1_HUMAN | Alpha-actinin-1 OS=Homo sapiens GN=ACTN1 PE=1 SV=2                       |
| AFAM_HUMAN  | Afamin OS=Homo sapiens GN=AFM PE=1 SV=1                                  |
| TTHY_HUMAN  | Transthyretin OS=Homo sapiens GN=TTR PE=1 SV=1                           |
| CO9_HUMAN   | Complement component C9 OS=Homo sapiens GN=C9 PE=1 SV=2                  |
| IGHG2_HUMAN | Immunoglobulin heavy constant gamma 2 OS=Homo sapiens GN=IGHG2 PE=1 SV=2 |
| FCN3_HUMAN  | Ficolin-3 OS=Homo sapiens GN=FCN3 PE=1 SV=2                              |
| PROS_HUMAN  | Vitamin K-dependent protein S OS=Homo sapiens GN=PROS1 PE=1 SV=1         |
| APOC1_HUMAN | Apolipoprotein C-I OS=Homo sapiens GN=APOC1 PE=1 SV=1                    |
| IGLC2_HUMAN | Immunoglobulin lambda constant 2 OS=Homo sapiens GN=IGLC2 PE=1 SV=1      |
| HPTR_HUMAN  | Haptoglobin-related protein OS=Homo sapiens GN=HPR PE=2 SV=2             |
| CO1A1_HUMAN | Collagen alpha-1(I) chain OS=Homo sapiens GN=COL1A1 PE=1 SV=5            |
| C1QB_HUMAN  | Complement C1q subcomponent subunit B OS=Homo sapiens GN=C1QB PE=1 SV=3  |
| URP2_HUMAN  | Fermitin family homolog 3 OS=Homo sapiens GN=FERMT3 PE=1 SV=1            |
| APOA_HUMAN  | Apolipoprotein(a) OS=Homo sapiens GN=LPA PE=1 SV=1                       |
| TBB1_HUMAN  | Tubulin beta-1 chain OS=Homo sapiens GN=TUBB1 PE=1 SV=1                  |
| PRDX2_HUMAN | Peroxiredoxin-2 OS=Homo sapiens GN=PRDX2 PE=1 SV=5                       |
| RAP1B_HUMAN | Ras-related protein Rap-1b OS=Homo sapiens GN=RAP1B PE=1 SV=1            |
| CD5L_HUMAN  | CD5 antigen-like OS=Homo sapiens GN=CD5L PE=1 SV=1                       |
| TBA4A_HUMAN | Tubulin alpha-4A chain OS=Homo sapiens GN=TUBA4A PE=1 SV=1               |

|                    |                                                                                                         |
|--------------------|---------------------------------------------------------------------------------------------------------|
| <b>SPTB1_HUMAN</b> | <b>Spectrin beta chain, erythrocytic OS=Homo sapiens GN=SPTB PE=1 SV=5</b>                              |
| C1QA_HUMAN         | Complement C1q subcomponent subunit A OS=Homo sapiens GN=C1QA PE=1 SV=2                                 |
| G3P_HUMAN          | Glyceraldehyde-3-phosphate dehydrogenase OS=Homo sapiens GN=GAPDH PE=1 SV=3                             |
| TAGLN2_HUMAN       | Transgelin-2 OS=Homo sapiens GN=TAGLN2 PE=1 SV=3                                                        |
| <b>SPTA1_HUMAN</b> | <b>Spectrin alpha chain, erythrocytic 1 OS=Homo sapiens GN=SPTA1 PE=1 SV=5</b>                          |
| ZPI_HUMAN          | Protein Z-dependent protease inhibitor OS=Homo sapiens GN=SERPINA10 PE=1 SV=1                           |
| PROF1_HUMAN        | Profilin-1 OS=Homo sapiens GN=PFN1 PE=1 SV=2                                                            |
| CO1A2_HUMAN        | Collagen alpha-2(I) chain OS=Homo sapiens GN=COL1A2 PE=1 SV=7                                           |
| IGA2_HUMAN         | Immunoglobulin alpha-2 heavy chain OS=Homo sapiens PE=1 SV=1                                            |
| S10A9_HUMAN        | Protein S100-A9 OS=Homo sapiens GN=S100A9 PE=1 SV=1                                                     |
| STOM_HUMAN         | Erythrocyte band 7 integral membrane protein OS=Homo sapiens GN=STOM PE=1 SV=3                          |
| LBP_HUMAN          | Lipopolysaccharide-binding protein OS=Homo sapiens GN=LBP PE=1 SV=3                                     |
| COF1_HUMAN         | Cofilin-1 OS=Homo sapiens GN=CFL1 PE=1 SV=3                                                             |
| ENOA_HUMAN         | Alpha-enolase OS=Homo sapiens GN=ENO1 PE=1 SV=2                                                         |
| MYL6_HUMAN         | Myosin light polypeptide 6 OS=Homo sapiens GN=MYL6 PE=1 SV=2                                            |
| KPYM_HUMAN         | Pyruvate kinase PKM OS=Homo sapiens GN=PKM PE=1 SV=4                                                    |
| CXCL7_HUMAN        | Platelet basic protein OS=Homo sapiens GN=PPBP PE=1 SV=3                                                |
| KV320_HUMAN        | Immunoglobulin kappa variable 3-20 OS=Homo sapiens GN=IGKV3-20 PE=1 SV=2                                |
| S10A8_HUMAN        | Protein S100-A8 OS=Homo sapiens GN=S100A8 PE=1 SV=1                                                     |
| ML12A_HUMAN        | Myosin regulatory light chain 12A OS=Homo sapiens GN=MYL12A PE=1 SV=2                                   |
| HABP2_HUMAN        | Hyaluronan-binding protein 2 OS=Homo sapiens GN=HABP2 PE=1 SV=1                                         |
| MOES_HUMAN         | Moesin OS=Homo sapiens GN=MSN PE=1 SV=3                                                                 |
| CAVIN2_HUMAN       | Caveolae-associated protein 2 OS=Homo sapiens GN=CAVIN2 PE=1 SV=3                                       |
| CAP1_HUMAN         | Adenylyl cyclase-associated protein 1 OS=Homo sapiens GN=CAP1 PE=1 SV=5                                 |
| GP1BA_HUMAN        | Platelet glycoprotein Ib alpha chain OS=Homo sapiens GN=GP1BA PE=1 SV=2                                 |
| ILK_HUMAN          | Integrin-linked protein kinase OS=Homo sapiens GN=ILK PE=1 SV=2                                         |
| LDHB_HUMAN         | L-lactate dehydrogenase B chain OS=Homo sapiens GN=LDHB PE=1 SV=2                                       |
| ALDOA_HUMAN        | Fructose-bisphosphate aldolase A OS=Homo sapiens GN=ALDOA PE=1 SV=2                                     |
| PLEK_HUMAN         | Pleckstrin OS=Homo sapiens GN=PLEK PE=1 SV=3                                                            |
| CO4A_HUMAN         | Complement C4-A OS=Homo sapiens GN=C4A PE=1 SV=2                                                        |
| PLF4_HUMAN         | Platelet factor 4 OS=Homo sapiens GN=PF4 PE=1 SV=2                                                      |
| PPIA_HUMAN         | Peptidyl-prolyl cis-trans isomerase A OS=Homo sapiens GN=PPIA PE=1 SV=2                                 |
| HSP7C_HUMAN        | Heat shock cognate 71 kDa protein OS=Homo sapiens GN=HSPA8 PE=1 SV=1                                    |
| GTR14_HUMAN        | Solute carrier family 2, facilitated glucose transporter member 14 OS=Homo sapiens GN=SLC2A14 PE=2 SV=1 |
| COR1A_HUMAN        | Coronin-1A OS=Homo sapiens GN=CORO1A PE=1 SV=4                                                          |
| TUBB5_HUMAN        | Tubulin beta chain OS=Homo sapiens GN=TUBB PE=1 SV=2                                                    |
| RSU1_HUMAN         | Ras suppressor protein 1 OS=Homo sapiens GN=RSU1 PE=1 SV=3                                              |



CATA\_HUMAN Catalase OS=Homo sapiens GN=CAT PE=1 SV=3  
 TYB4\_HUMAN Thymosin beta-4 OS=Homo sapiens GN=TMSB4X PE=1 SV=2  
 GP1BB\_HUMAN Platelet glycoprotein Ib beta chain OS=Homo sapiens GN=GP1BB PE=1 SV=1  
 KV401\_HUMAN Immunoglobulin kappa variable 4-1 OS=Homo sapiens GN=IGKV4-1 PE=1 SV=1  
 H2B1B\_HUMAN Histone H2B type 1-B OS=Homo sapiens GN=HIST1H2BB PE=1 SV=2  
 1433E\_HUMAN 14-3-3 protein epsilon OS=Homo sapiens GN=YWHAE PE=1 SV=1  
 1B35\_HUMAN HLA class I histocompatibility antigen, B-35 alpha chain OS=Homo sapiens GN=HLA-B PE=1 SV=1  
 CAH1\_HUMAN Carbonic anhydrase 1 OS=Homo sapiens GN=CA1 PE=1 SV=2  
 WDR1\_HUMAN WD repeat-containing protein 1 OS=Homo sapiens GN=WDR1 PE=1 SV=4  
 KV230\_HUMAN Immunoglobulin kappa variable 2-30 OS=Homo sapiens GN=IGKV2-30 PE=3 SV=2  
 ANK1\_HUMAN Ankyrin-1 OS=Homo sapiens GN=ANK1 PE=1 SV=3  
 KV311\_HUMAN Immunoglobulin kappa variable 3-11 OS=Homo sapiens GN=IGKV3-11 PE=1 SV=1  
 CRAC1\_HUMAN Cartilage acidic protein 1 OS=Homo sapiens GN=CRTAC1 PE=1 SV=2  
 GSTO1\_HUMAN Glutathione S-transferase omega-1 OS=Homo sapiens GN=GSTO1 PE=1 SV=2  
 BIN2\_HUMAN Bridging integrator 2 OS=Homo sapiens GN=BIN2 PE=1 SV=3  
 HV434\_HUMAN Immunoglobulin heavy variable 4-34 OS=Homo sapiens GN=IGHV4-34 PE=1 SV=2  
 PDIA3\_HUMAN Protein disulfide-isomerase A3 OS=Homo sapiens GN=PDIA3 PE=1 SV=4  
 B2MG\_HUMAN Beta-2-microglobulin OS=Homo sapiens GN=B2M PE=1 SV=1  
 TPIS\_HUMAN Triosephosphate isomerase OS=Homo sapiens GN=TPI1 PE=1 SV=3  
 GTR1\_HUMAN Solute carrier family 2, facilitated glucose transporter member 1 OS=Homo sapiens GN=SLC2A1 PE=1 SV=2  
 GPIX\_HUMAN Platelet glycoprotein IX OS=Homo sapiens GN=GP9 PE=1 SV=3  
 TERA\_HUMAN Transitional endoplasmic reticulum ATPase OS=Homo sapiens GN=VCP PE=1 SV=4  
 ZYX\_HUMAN Zyxin OS=Homo sapiens GN=ZYX PE=1 SV=1  
 PGK1\_HUMAN Phosphoglycerate kinase 1 OS=Homo sapiens GN=PGK1 PE=1 SV=3  
 GPV\_HUMAN Platelet glycoprotein V OS=Homo sapiens GN=GP5 PE=1 SV=1  
 PRDX6\_HUMAN Peroxiredoxin-6 OS=Homo sapiens GN=PRDX6 PE=1 SV=3  
 RAB1B\_HUMAN Ras-related protein Rab-1B OS=Homo sapiens GN=RAB1B PE=1 SV=1  
 PNP\_HUMAN Purine nucleoside phosphorylase OS=Homo sapiens GN=PNP PE=1 SV=2  
 VASP\_HUMAN Vasodilator-stimulated phosphoprotein OS=Homo sapiens GN=VASP PE=1 SV=3  
 1433G\_HUMAN 14-3-3 protein gamma OS=Homo sapiens GN=YWHAG PE=1 SV=2  
 CALR\_HUMAN Calreticulin OS=Homo sapiens GN=CALR PE=1 SV=1  
 CO3A1\_HUMAN Collagen alpha-1(III) chain OS=Homo sapiens GN=COL3A1 PE=1 SV=4  
 TRFL\_HUMAN Lactotransferrin OS=Homo sapiens GN=LTF PE=1 SV=6  
 COR1C\_HUMAN Coronin-1C OS=Homo sapiens GN=CORO1C PE=1 SV=1  
 ARF1\_HUMAN ADP-ribosylation factor 1 OS=Homo sapiens GN=ARF1 PE=1 SV=2  
 RET4\_HUMAN Retinol-binding protein 4 OS=Homo sapiens GN=RBP4 PE=1 SV=3  
 CAZA1\_HUMAN F-actin-capping protein subunit alpha-1 OS=Homo sapiens GN=CAPZA1 PE=1 SV=3

|              |                                                                                |
|--------------|--------------------------------------------------------------------------------|
| PDL11_HUMAN  | PDZ and LIM domain protein 1 OS=Homo sapiens GN=PDLIM1 PE=1 SV=4               |
| EF1A1_HUMAN  | Elongation factor 1-alpha 1 OS=Homo sapiens GN=EEF1A1 PE=1 SV=1                |
| RB11A_HUMAN  | Ras-related protein Rab-11A OS=Homo sapiens GN=RAB11A PE=1 SV=3                |
| LDHA_HUMAN   | L-lactate dehydrogenase A chain OS=Homo sapiens GN=LDHA PE=1 SV=2              |
| TUBA1B_HUMAN | Tubulin alpha-1B chain OS=Homo sapiens GN=TUBA1B PE=1 SV=1                     |
| CALM1_HUMAN  | Calmodulin-1 OS=Homo sapiens GN=CALM1 PE=1 SV=1                                |
| LEGL_HUMAN   | Galectin-related protein OS=Homo sapiens GN=LGALS1 PE=1 SV=2                   |
| CAN1_HUMAN   | Calpain-1 catalytic subunit OS=Homo sapiens GN=CAPN1 PE=1 SV=1                 |
| HEM2_HUMAN   | Delta-aminolevulinic acid dehydratase OS=Homo sapiens GN=ALAD PE=1 SV=1        |
| ARPC4_HUMAN  | Actin-related protein 2/3 complex subunit 4 OS=Homo sapiens GN=ARPC4 PE=1 SV=3 |

## S-AgNP

| Accession          | Protein Name                                                                    |
|--------------------|---------------------------------------------------------------------------------|
| ALBU_HUMAN         | Serum albumin OS=Homo sapiens GN=ALB PE=1 SV=2                                  |
| CO3_HUMAN          | Complement C3 OS=Homo sapiens GN=C3 PE=1 SV=2                                   |
| TRFE_HUMAN         | Serotransferrin OS=Homo sapiens GN=TF PE=1 SV=3                                 |
| FIBB_HUMAN         | Fibrinogen beta chain OS=Homo sapiens GN=FGB PE=1 SV=2                          |
| FIBA_HUMAN         | Fibrinogen alpha chain OS=Homo sapiens GN=FGA PE=1 SV=2                         |
| <b>APOA1_HUMAN</b> | <b>Apolipoprotein A-I OS=Homo sapiens GN=APOA1 PE=1 SV=1</b>                    |
| APOB_HUMAN         | Apolipoprotein B-100 OS=Homo sapiens GN=APOB PE=1 SV=2                          |
| A1AT_HUMAN         | Alpha-1-antitrypsin OS=Homo sapiens GN=SERPINA1 PE=1 SV=3                       |
| FIBG_HUMAN         | Fibrinogen gamma chain OS=Homo sapiens GN=FGG PE=1 SV=3                         |
| HPT_HUMAN          | Haptoglobin OS=Homo sapiens GN=HP PE=1 SV=1                                     |
| CERU_HUMAN         | Ceruloplasmin OS=Homo sapiens GN=CP PE=1 SV=1                                   |
| TLN1_HUMAN         | Talin-1 OS=Homo sapiens GN=TLN1 PE=1 SV=3                                       |
| APOA4_HUMAN        | Apolipoprotein A-IV OS=Homo sapiens GN=APOA4 PE=1 SV=3                          |
| IGHM_HUMAN         | Immunoglobulin heavy constant mu OS=Homo sapiens GN=IGHM PE=1 SV=4              |
| CO4B_HUMAN         | Complement C4-B OS=Homo sapiens GN=C4B PE=1 SV=2                                |
| TRY1_HUMAN         | Trypsin-1 OS=Homo sapiens GN=PRSS1 PE=1 SV=1                                    |
| ITIH2_HUMAN        | Inter-alpha-trypsin inhibitor heavy chain H2 OS=Homo sapiens GN=ITIH2 PE=1 SV=2 |
| ITIH4_HUMAN        | Inter-alpha-trypsin inhibitor heavy chain H4 OS=Homo sapiens GN=ITIH4 PE=1 SV=4 |
| IGG1_HUMAN         | Immunoglobulin gamma-1 heavy chain OS=Homo sapiens GN=IGG1 PE=1 SV=1            |
| HEMO_HUMAN         | Hemopexin OS=Homo sapiens GN=HPX PE=1 SV=2                                      |
| FLNA_HUMAN         | Filamin-A OS=Homo sapiens GN=FLNA PE=1 SV=4                                     |
| ANT3_HUMAN         | Antithrombin-III OS=Homo sapiens GN=SERPINC1 PE=1 SV=1                          |
| FINC_HUMAN         | Fibronectin OS=Homo sapiens GN=FN1 PE=1 SV=4                                    |

|             |                                                                          |
|-------------|--------------------------------------------------------------------------|
| MYH9_HUMAN  | Myosin-9 OS=Homo sapiens GN=MYH9 PE=1 SV=4                               |
| ACTB_HUMAN  | Actin, cytoplasmic 1 OS=Homo sapiens GN=ACTB PE=1 SV=1                   |
| VTDB_HUMAN  | Vitamin D-binding protein OS=Homo sapiens GN=GC PE=1 SV=1                |
| GELS_HUMAN  | Gelsolin OS=Homo sapiens GN=GSN PE=1 SV=1                                |
| PLMN_HUMAN  | Plasminogen OS=Homo sapiens GN=PLG PE=1 SV=2                             |
| CFAB_HUMAN  | Complement factor B OS=Homo sapiens GN=CFB PE=1 SV=2                     |
| HBA_HUMAN   | Hemoglobin subunit alpha OS=Homo sapiens GN=HBA1 PE=1 SV=2               |
| KNG1_HUMAN  | Kininogen-1 OS=Homo sapiens GN=KNG1 PE=1 SV=2                            |
| APOE_HUMAN  | Apolipoprotein E OS=Homo sapiens GN=APOE PE=1 SV=1                       |
| HEP2_HUMAN  | Heparin cofactor 2 OS=Homo sapiens GN=SERPIND1 PE=1 SV=3                 |
| HBD_HUMAN   | Hemoglobin subunit delta OS=Homo sapiens GN=HBD PE=1 SV=2                |
| VTNC_HUMAN  | Vitronectin OS=Homo sapiens GN=VTN PE=1 SV=1                             |
| APOA2_HUMAN | Apolipoprotein A-II OS=Homo sapiens GN=APOA2 PE=1 SV=1                   |
| HBB_HUMAN   | Hemoglobin subunit beta OS=Homo sapiens GN=HBB PE=1 SV=2                 |
| PON1_HUMAN  | Serum paraoxonase/arylesterase 1 OS=Homo sapiens GN=PON1 PE=1 SV=3       |
| FETUA_HUMAN | Alpha-2-HS-glycoprotein OS=Homo sapiens GN=AHSG PE=1 SV=1                |
| AACT_HUMAN  | Alpha-1-antichymotrypsin OS=Homo sapiens GN=SERPINA3 PE=1 SV=2           |
| IGHA1_HUMAN | Immunoglobulin heavy constant alpha 1 OS=Homo sapiens GN=IGHA1 PE=1 SV=2 |
| IGHG4_HUMAN | Immunoglobulin heavy constant gamma 4 OS=Homo sapiens GN=IGHG4 PE=1 SV=1 |
| CLUS_HUMAN  | Clusterin OS=Homo sapiens GN=CLU PE=1 SV=1                               |
| IGL1_HUMAN  | Immunoglobulin lambda-1 light chain OS=Homo sapiens PE=1 SV=1            |
| IGK_HUMAN   | Immunoglobulin kappa light chain OS=Homo sapiens PE=1 SV=1               |
| HRG_HUMAN   | Histidine-rich glycoprotein OS=Homo sapiens GN=HRG PE=1 SV=1             |
| C1R_HUMAN   | Complement C1r subcomponent OS=Homo sapiens GN=C1R PE=1 SV=2             |
| A1AG2_HUMAN | Alpha-1-acid glycoprotein 2 OS=Homo sapiens GN=ORM2 PE=1 SV=2            |
| APOH_HUMAN  | Beta-2-glycoprotein 1 OS=Homo sapiens GN=APOH PE=1 SV=3                  |
| APOL1_HUMAN | Apolipoprotein L1 OS=Homo sapiens GN=APOL1 PE=1 SV=5                     |
| APOC3_HUMAN | Apolipoprotein C-III OS=Homo sapiens GN=APOC3 PE=1 SV=1                  |
| AMBP_HUMAN  | Protein AMBP OS=Homo sapiens GN=AMBP PE=1 SV=1                           |
| ITA2B_HUMAN | Integrin alpha-IIb OS=Homo sapiens GN=ITGA2B PE=1 SV=3                   |
| F13A_HUMAN  | Coagulation factor XIII A chain OS=Homo sapiens GN=F13A1 PE=1 SV=4       |
| APOC2_HUMAN | Apolipoprotein C-II OS=Homo sapiens GN=APOC2 PE=1 SV=1                   |
| VINC_HUMAN  | Vinculin OS=Homo sapiens GN=VCL PE=1 SV=4                                |
| PGRP2_HUMAN | N-acetylmuramoyl-L-alanine amidase OS=Homo sapiens GN=PGLYRP2 PE=1 SV=1  |
| IGHG3_HUMAN | Immunoglobulin heavy constant gamma 3 OS=Homo sapiens GN=IGHG3 PE=1 SV=2 |
| 1433Z_HUMAN | 14-3-3 protein zeta/delta OS=Homo sapiens GN=YWHAZ PE=1 SV=1             |
| TSP1_HUMAN  | Thrombospondin-1 OS=Homo sapiens GN=THBS1 PE=1 SV=2                      |

|                    |                                                                                |
|--------------------|--------------------------------------------------------------------------------|
| ITB3_HUMAN         | Integrin beta-3 OS=Homo sapiens GN=ITGB3 PE=1 SV=2                             |
| IGKC_HUMAN         | Immunoglobulin kappa constant OS=Homo sapiens GN=IGKC PE=1 SV=2                |
| TPM4_HUMAN         | Tropomyosin alpha-4 chain OS=Homo sapiens GN=TPM4 PE=1 SV=3                    |
| B3AT_HUMAN         | Band 3 anion transport protein OS=Homo sapiens GN=SLC4A1 PE=1 SV=3             |
| ACTN1_HUMAN        | Alpha-actinin-1 OS=Homo sapiens GN=ACTN1 PE=1 SV=2                             |
| AFAM_HUMAN         | Afamin OS=Homo sapiens GN=AFM PE=1 SV=1                                        |
| TTHY_HUMAN         | Transthyretin OS=Homo sapiens GN=TTR PE=1 SV=1                                 |
| IGHG2_HUMAN        | Immunoglobulin heavy constant gamma 2 OS=Homo sapiens GN=IGHG2 PE=1 SV=2       |
| FCN3_HUMAN         | Ficolin-3 OS=Homo sapiens GN=FCN3 PE=1 SV=2                                    |
| APOC1_HUMAN        | Apolipoprotein C-I OS=Homo sapiens GN=APOC1 PE=1 SV=1                          |
| IGLC2_HUMAN        | Immunoglobulin lambda constant 2 OS=Homo sapiens GN=IGLC2 PE=1 SV=1            |
| APOD_HUMAN         | Apolipoprotein D OS=Homo sapiens GN=APOD PE=1 SV=1                             |
| A1AG1_HUMAN        | Alpha-1-acid glycoprotein 1 OS=Homo sapiens GN=ORM1 PE=1 SV=1                  |
| C1QB_HUMAN         | Complement C1q subcomponent subunit B OS=Homo sapiens GN=C1QB PE=1 SV=3        |
| URP2_HUMAN         | Fermitin family homolog 3 OS=Homo sapiens GN=FERMT3 PE=1 SV=1                  |
| TBB1_HUMAN         | Tubulin beta-1 chain OS=Homo sapiens GN=TUBB1 PE=1 SV=1                        |
| PRDX2_HUMAN        | Peroxiredoxin-2 OS=Homo sapiens GN=PRDX2 PE=1 SV=5                             |
| RAP1B_HUMAN        | Ras-related protein Rap-1b OS=Homo sapiens GN=RAP1B PE=1 SV=1                  |
| CD5L_HUMAN         | CD5 antigen-like OS=Homo sapiens GN=CD5L PE=1 SV=1                             |
| TBA4A_HUMAN        | Tubulin alpha-4A chain OS=Homo sapiens GN=TUBA4A PE=1 SV=1                     |
| <b>SPTB1_HUMAN</b> | <b>Spectrin beta chain, erythrocytic OS=Homo sapiens GN=SPTB PE=1 SV=5</b>     |
| G3P_HUMAN          | Glyceraldehyde-3-phosphate dehydrogenase OS=Homo sapiens GN=GAPDH PE=1 SV=3    |
| TAGL2_HUMAN        | Transgelin-2 OS=Homo sapiens GN=TAGLN2 PE=1 SV=3                               |
| <b>SPTA1_HUMAN</b> | <b>Spectrin alpha chain, erythrocytic 1 OS=Homo sapiens GN=SPTA1 PE=1 SV=5</b> |
| ZPI_HUMAN          | Protein Z-dependent protease inhibitor OS=Homo sapiens GN=SERPINA10 PE=1 SV=1  |
| PROF1_HUMAN        | Profilin-1 OS=Homo sapiens GN=PFN1 PE=1 SV=2                                   |
| STOM_HUMAN         | Erythrocyte band 7 integral membrane protein OS=Homo sapiens GN=STOM PE=1 SV=3 |
| COF1_HUMAN         | Cofilin-1 OS=Homo sapiens GN=CFL1 PE=1 SV=3                                    |
| ENOA_HUMAN         | Alpha-enolase OS=Homo sapiens GN=ENO1 PE=1 SV=2                                |
| MYL6_HUMAN         | Myosin light polypeptide 6 OS=Homo sapiens GN=MYL6 PE=1 SV=2                   |
| KPYM_HUMAN         | Pyruvate kinase PKM OS=Homo sapiens GN=PKM PE=1 SV=4                           |
| CXCL7_HUMAN        | Platelet basic protein OS=Homo sapiens GN=PPBP PE=1 SV=3                       |
| SAA4_HUMAN         | Serum amyloid A-4 protein OS=Homo sapiens GN=SAA4 PE=1 SV=2                    |
| KV320_HUMAN        | Immunoglobulin kappa variable 3-20 OS=Homo sapiens GN=IGKV3-20 PE=1 SV=2       |
| S10A8_HUMAN        | Protein S100-A8 OS=Homo sapiens GN=S100A8 PE=1 SV=1                            |
| ML12A_HUMAN        | Myosin regulatory light chain 12A OS=Homo sapiens GN=MYL12A PE=1 SV=2          |
| APOC4_HUMAN        | Apolipoprotein C-IV OS=Homo sapiens GN=APOC4 PE=1 SV=1                         |

|             |                                                                                                         |
|-------------|---------------------------------------------------------------------------------------------------------|
| MOES_HUMAN  | Moesin OS=Homo sapiens GN=MSN PE=1 SV=3                                                                 |
| CAVN2_HUMAN | Caveolae-associated protein 2 OS=Homo sapiens GN=CAVIN2 PE=1 SV=3                                       |
| CAP1_HUMAN  | Adenylyl cyclase-associated protein 1 OS=Homo sapiens GN=CAP1 PE=1 SV=5                                 |
| GP1BA_HUMAN | Platelet glycoprotein Ib alpha chain OS=Homo sapiens GN=GP1BA PE=1 SV=2                                 |
| ILK_HUMAN   | Integrin-linked protein kinase OS=Homo sapiens GN=ILK PE=1 SV=2                                         |
| LDHB_HUMAN  | L-lactate dehydrogenase B chain OS=Homo sapiens GN=LDHB PE=1 SV=2                                       |
| ALDOA_HUMAN | Fructose-bisphosphate aldolase A OS=Homo sapiens GN=ALDOA PE=1 SV=2                                     |
| PLEK_HUMAN  | Pleckstrin OS=Homo sapiens GN=PLEK PE=1 SV=3                                                            |
| CO4A_HUMAN  | Complement C4-A OS=Homo sapiens GN=C4A PE=1 SV=2                                                        |
| PLF4_HUMAN  | Platelet factor 4 OS=Homo sapiens GN=PF4 PE=1 SV=2                                                      |
| PPIA_HUMAN  | Peptidyl-prolyl cis-trans isomerase A OS=Homo sapiens GN=PPIA PE=1 SV=2                                 |
| HSP7C_HUMAN | Heat shock cognate 71 kDa protein OS=Homo sapiens GN=HSPA8 PE=1 SV=1                                    |
| GTR14_HUMAN | Solute carrier family 2, facilitated glucose transporter member 14 OS=Homo sapiens GN=SLC2A14 PE=2 SV=1 |
| COR1A_HUMAN | Coronin-1A OS=Homo sapiens GN=CORO1A PE=1 SV=4                                                          |
| TBB5_HUMAN  | Tubulin beta chain OS=Homo sapiens GN=TUBB PE=1 SV=2                                                    |
| RSU1_HUMAN  | Ras suppressor protein 1 OS=Homo sapiens GN=RSU1 PE=1 SV=3                                              |
| CATA_HUMAN  | Catalase OS=Homo sapiens GN=CAT PE=1 SV=3                                                               |
| TYB4_HUMAN  | Thymosin beta-4 OS=Homo sapiens GN=TMSB4X PE=1 SV=2                                                     |
| GP1BB_HUMAN | Platelet glycoprotein Ib beta chain OS=Homo sapiens GN=GP1BB PE=1 SV=1                                  |
| KV401_HUMAN | Immunoglobulin kappa variable 4-1 OS=Homo sapiens GN=IGKV4-1 PE=1 SV=1                                  |
| H2B1B_HUMAN | Histone H2B type 1-B OS=Homo sapiens GN=HIST1H2BB PE=1 SV=2                                             |
| 1433E_HUMAN | 14-3-3 protein epsilon OS=Homo sapiens GN=YWHAE PE=1 SV=1                                               |
| 1B35_HUMAN  | HLA class I histocompatibility antigen, B-35 alpha chain OS=Homo sapiens GN=HLA-B PE=1 SV=1             |
| CAH1_HUMAN  | Carbonic anhydrase 1 OS=Homo sapiens GN=CA1 PE=1 SV=2                                                   |
| WDR1_HUMAN  | WD repeat-containing protein 1 OS=Homo sapiens GN=WDR1 PE=1 SV=4                                        |
| KV315_HUMAN | Immunoglobulin kappa variable 3-15 OS=Homo sapiens GN=IGKV3-15 PE=1 SV=2                                |
| ANK1_HUMAN  | Ankyrin-1 OS=Homo sapiens GN=ANK1 PE=1 SV=3                                                             |
| GSTO1_HUMAN | Glutathione S-transferase omega-1 OS=Homo sapiens GN=GSTO1 PE=1 SV=2                                    |
| BIN2_HUMAN  | Bridging integrator 2 OS=Homo sapiens GN=BIN2 PE=1 SV=3                                                 |
| PDIA3_HUMAN | Protein disulfide-isomerase A3 OS=Homo sapiens GN=PDIA3 PE=1 SV=4                                       |
| B2MG_HUMAN  | Beta-2-microglobulin OS=Homo sapiens GN=B2M PE=1 SV=1                                                   |
| TPIS_HUMAN  | Triosephosphate isomerase OS=Homo sapiens GN=TPI1 PE=1 SV=3                                             |
| GTR1_HUMAN  | Solute carrier family 2, facilitated glucose transporter member 1 OS=Homo sapiens GN=SLC2A1 PE=1 SV=2   |
| GPIX_HUMAN  | Platelet glycoprotein IX OS=Homo sapiens GN=GP9 PE=1 SV=3                                               |
| TERA_HUMAN  | Transitional endoplasmic reticulum ATPase OS=Homo sapiens GN=VCP PE=1 SV=4                              |
| ZYX_HUMAN   | Zyxin OS=Homo sapiens GN=ZYX PE=1 SV=1                                                                  |
| PGK1_HUMAN  | Phosphoglycerate kinase 1 OS=Homo sapiens GN=PGK1 PE=1 SV=3                                             |

|              |                                                                                                    |
|--------------|----------------------------------------------------------------------------------------------------|
| PRDX6_HUMAN  | Peroxiredoxin-6 OS=Homo sapiens GN=PRDX6 PE=1 SV=3                                                 |
| RAB1B_HUMAN  | Ras-related protein Rab-1B OS=Homo sapiens GN=RAB1B PE=1 SV=1                                      |
| PNPH_HUMAN   | Purine nucleoside phosphorylase OS=Homo sapiens GN=PNP PE=1 SV=2                                   |
| VASP_HUMAN   | Vasodilator-stimulated phosphoprotein OS=Homo sapiens GN=VASP PE=1 SV=3                            |
| 1433G_HUMAN  | 14-3-3 protein gamma OS=Homo sapiens GN=YWHAG PE=1 SV=2                                            |
| CALR_HUMAN   | Calreticulin OS=Homo sapiens GN=CALR PE=1 SV=1                                                     |
| TRFL_HUMAN   | Lactotransferrin OS=Homo sapiens GN=LTF PE=1 SV=6                                                  |
| COR1C_HUMAN  | Coronin-1C OS=Homo sapiens GN=CORO1C PE=1 SV=1                                                     |
| K2C1_HUMAN   | Keratin, type II cytoskeletal 1 OS=Homo sapiens GN=KRT1 PE=1 SV=6                                  |
| ARF1_HUMAN   | ADP-ribosylation factor 1 OS=Homo sapiens GN=ARF1 PE=1 SV=2                                        |
| CAZA1_HUMAN  | F-actin-capping protein subunit alpha-1 OS=Homo sapiens GN=CAPZA1 PE=1 SV=3                        |
| PDL1_HUMAN   | PDZ and LIM domain protein 1 OS=Homo sapiens GN=PDLIM1 PE=1 SV=4                                   |
| EF1A1_HUMAN  | Elongation factor 1-alpha 1 OS=Homo sapiens GN=EEF1A1 PE=1 SV=1                                    |
| RB11A_HUMAN  | Ras-related protein Rab-11A OS=Homo sapiens GN=RAB11A PE=1 SV=3                                    |
| LDHA_HUMAN   | L-lactate dehydrogenase A chain OS=Homo sapiens GN=LDHA PE=1 SV=2                                  |
| CAH2_HUMAN   | Carbonic anhydrase 2 OS=Homo sapiens GN=CA2 PE=1 SV=2                                              |
| GNB1_HUMAN   | Guanine nucleotide-binding protein G(I)/G(S)/G(T) subunit beta-1 OS=Homo sapiens GN=GNB1 PE=1 SV=3 |
| TUBA1B_HUMAN | Tubulin alpha-1B chain OS=Homo sapiens GN=TUBA1B PE=1 SV=1                                         |
| CALM1_HUMAN  | Calmodulin-1 OS=Homo sapiens GN=CALM1 PE=1 SV=1                                                    |
| LEGL_HUMAN   | Galectin-related protein OS=Homo sapiens GN=LGALS1 PE=1 SV=2                                       |
| H4_HUMAN     | Histone H4 OS=Homo sapiens GN=HIST1H4A PE=1 SV=2                                                   |
| BLVRB_HUMAN  | Flavin reductase (NADPH) OS=Homo sapiens GN=BLVRB PE=1 SV=3                                        |
